# Supplementary material for: Histological hallmarks and role of Slug/PIP axis in pulmonary hypertension secondary to pulmonary fibrosis
Source: PubMed Central journal article supplement (PMC6728601; doi:10.15252/emmm.201810061), 2019-08-29
Supplement: EMMM-11-e10061-s001.pdf [file EMMM-11-e10061-s001.pdf]

## **Appendix**

### **Table of content:**

**Appendix Table S1:** Patients characteristics

**Appendix Table S2:** Expression of Slug transcriptional targets genes

**Appendix Table S3:** Slug transcriptional targets annotated for proliferation

**Appendix Table S4:** Slug transcriptional targets annotated for extracellular matrix

**Appendix Table S5:** Statistics

| Appendix Table S1 |              |     |     |             |                                         |          |                        |          |         |                   |         |                   |          |                    |                    |                   |                |
|-------------------|--------------|-----|-----|-------------|-----------------------------------------|----------|------------------------|----------|---------|-------------------|---------|-------------------|----------|--------------------|--------------------|-------------------|----------------|
|                   | Diagnostic   | Age | Sex | mPAP (mmHg) | CO <sup>-1</sup> (L.min <sup>-1</sup> ) | PVR (WU) | Medication             | 6MWD (m) | FVC (L) | FVC (% predicted) | FEV1(L) | FEV1 (%predicted) | FEV1/FVC | DLCO (mL/min/mmHg) | DLCO (% predicted) | Oxygen saturation | Oxygen use (L) |
| Ctrl              | Pneumothorax | 20  | M   | n/a         | n/a                                     | n/a      | n/a                    | n/a      | n/a     | n/a               | n/a     | n/a               | n/a      | n/a                | n/a                | n/a               | n/a            |
|                   | Pneumothorax | 21  | M   | n/a         | n/a                                     | n/a      | n/a                    | n/a      | n/a     | n/a               | n/a     | n/a               | n/a      | n/a                | n/a                | n/a               | n/a            |
|                   | Pneumothorax | 34  | M   | n/a         | n/a                                     | n/a      | n/a                    | n/a      | n/a     | n/a               | n/a     | n/a               | n/a      | n/a                | n/a                | n/a               | n/a            |
|                   | Healthy lung | 73  | M   | n/a         | n/a                                     | n/a      | n/a                    | n/a      | n/a     | n/a               | n/a     | n/a               | n/a      | n/a                | n/a                | n/a               | n/a            |
| PAH               | iPAH         | 48  | F   | 65          | 5.7                                     | n/a      | Trep. Maci. Amb. Tada. | 390      | n/a     | n/a               | n/a     | n/a               | n/a      | n/a                | n/a                | n/a               | n/a            |
|                   | iPAH         | 24  | F   | 65          | 4.44                                    | n/a      | Trep. Amb. Tada.       | n/a      | n/a     | n/a               | n/a     | n/a               | n/a      | n/a                | n/a                | n/a               | n/a            |
|                   | iPAH         | 49  | F   | 65          | n/a                                     | n/a      | n/a                    | n/a      | n/a     | n/a               | n/a     | n/a               | n/a      | n/a                | n/a                | n/a               | n/a            |
|                   | iPAH         | 55  | F   | 55          | 8.97                                    | 4.8      | Epop. Tada.            | 475      | n/a     | n/a               | n/a     | n/a               | n/a      | n/a                | n/a                | n/a               | n/a            |
|                   | iPAH         | 42  | F   | 78          | 4.2                                     | 15.9     | Epop. Maci. Tada       | 96       | n/a     | n/a               | n/a     | n/a               | n/a      | n/a                | n/a                | n/a               | n/a            |
|                   | iPAH         | 34  | F   | 56          | 2.87                                    | n/a      | Trep. Maci. Tada       | 210      | n/a     | n/a               | n/a     | n/a               | n/a      | n/a                | n/a                | n/a               | n/a            |
|                   | iPAH         | 50  | F   | 59          | 6.65                                    | 6.61     | Trep. Maci. Tada       | 90       | n/a     | n/a               | n/a     | n/a               | n/a      | n/a                | n/a                | n/a               | n/a            |
| PF                | iPF          | 68  | M   | 23          | 4.3                                     | 1.9      | -                      | 111      | 1.57    | 38.5              | 1.41    | 44.9              | 89       | n/a                | 29                 | 94                | 15             |
|                   | UIP          | 51  | M   | 23          | 8.3                                     | n/a      | -                      | 210      | 1.87    | 36.9              | 1.62    | 41.2              | 87       | 7.4                | 22.1               | 99                | 6              |
|                   | iPF          | 64  | M   | 24          | 6.1                                     | 2.3      | -                      | 120      | 3.68    | 70                | 3.22    | 90                | 88       | 6                  | 20                 | 94                | 2              |
|                   | iPF          | 64  | M   | 20          | 6.2                                     | 1.61     | -                      | 249      | 3.09    | 58                | 2.48    | 62.1              | 80       | 9.05               | 26.8               | 96                | 3              |
|                   | NSIP         | 42  | F   | 24          | 5.28                                    | 3.03     | -                      |          | 2.52    | 71                | 2.26    | 77                | 90       | 5.3                | 17                 | 100               | 3              |
|                   | UIP          | 62  | M   | 20          | 4.4                                     | 1.77     | -                      | 430      | n/a     | n/a               | n/a     | n/a               | n/a      | n/a                | n/a                | 97                | 6              |
|                   | CHP          | 42  | F   | 20          | 5.67                                    | 3.18     | -                      |          | 0.86    | 21.2              | 0.79    | 24                | 91       | 4.3                | 17                 | 96                | 6              |
|                   | iPF          | 72  | M   | 24          | 5.8                                     | 3        | -                      | 240      | 1.87    | 46                | 1.56    | 53                | 84       | n/a                | n/a                | 91                | 4              |

|             |        |    |    |     |      |       |             |      |      |      |      |      |     |      |      |     |   |
|-------------|--------|----|----|-----|------|-------|-------------|------|------|------|------|------|-----|------|------|-----|---|
|             | iPF    | 72 | M  | 22  | 5.4  | n/a   | Pirf.       | 120  | 3.85 | 88   | 2.94 | 91   | 76  | 9.86 | 33.6 | 92  | 0 |
|             | iPF    | 64 | M  | 16  | 5.17 | n/a   | -           | 208  | 2.01 | 42   | 1.67 | 46   | 83  | 9.05 | 32   | 94  | 6 |
|             | iPF    | 66 | F  | 13  | 2.6  | n/a   | -           | 124  | 0.93 | 37   | 0.66 | 34   | 71  | 3.6  | 27   | 100 | 4 |
|             | UIP    | 54 | F  | 23  | 4    | 3.5   | -           | 156  | 2.01 | 42   | 1.67 | 46   | 83  | 2.64 | 11.9 | 100 | 4 |
|             | UIP    | 58 | F  | 10  | 4.05 | n/a   | -           | n/a  | 0.88 | 31   | 0.74 | 33   | 84  | 7.66 | 39   | 99  | 2 |
|             | UIP    | 68 | M  | 23  | 5.76 | 2.94  | Vals.       | 465  | 2.57 | 54   | 2.15 | 61   | 84  | 5.36 | 17.4 | 93  | 2 |
| PF-PH       | UIP/PH | 73 | M  | 27  | n/a  | 2.6   | -           | 475  | 2.17 | 55.2 | 1.62 | 56.3 | 74  | 9.04 | 33.4 | 100 | 3 |
|             | iPF/PH | 66 | M  | 27  | 5.47 | 3.1   | Pirf.       | 258  | 4.25 | 93.1 | 2.85 | 83.7 | 67  | 12.1 | 42   | 96  | 3 |
|             | iPF/PH | 71 | M  | 26  | 5.36 | n/a   | -           | 327  | 2.47 | 56.4 | 2.24 | 69.5 | 90  | 10.1 | 40   | 97  | 3 |
|             | iPF/PH | 65 | F  | 32  | 4.95 | 3.6   | Losa.       | 128  | 1.64 | 53   | 1.54 | 65   | 94  | 5.6  | 25   | 95  | 5 |
|             | iPF/PH | 68 | F  | 26  | 4.7  | n/a   | -           | 60   | 0.95 | 34   | 0.87 | 41   | 91  | n/a  | n/a  | 93  | 6 |
|             | iPF/PH | 66 | F  | 36  | 3.6  | 5.7   | Sild.       | 209  | 1.17 | 42   | 1.02 | 48   | 87  | 5.54 | 26.6 | 100 | 6 |
|             | iPF/PH | 65 | M  | 26  | 4.1  | 4     | -           | 24   | 2.16 | 53   | 1.95 | 69   | 90  | 6.16 | 22   | 97  | 8 |
|             | iPF/PH | 64 | F  | 26  | 3.5  | n/a   | -           | n/a  | 0.66 | 26.6 | 0.62 | 32.8 | 94  | n/a  | n/a  | 99  | 6 |
|             | UIP/PH | 65 | F  | 30  | 4    | 5.5   | -           | 240  | 1.53 | 49   | 1.37 | 57   | 89  | 4.14 | 18.2 | 100 | 4 |
|             | UIP/PH | 64 | F  | 44  | 4.2  | 7.6   | Trep. Tada. | 195  | 1.43 | 52   | 1.16 | 55   | 81  | 3.38 | 16.5 | 99  | 6 |
|             | CHP/PH | 34 | M  | 37  | 7.1  | n/a   | -           | n/a  | 1.01 | 18.2 | 0.76 | 16.6 | 75  | 8.25 | 22   | 95  | 2 |
|             | UIP/PH | 66 | M  | 47  | 3.83 | 6.54  | -           | n/a  | 1.42 | 33   | 1.23 | 37   | 86  | 2.7  | n/a  | 96  | 6 |
|             | iPF/PH | 61 | M  | 32  | 4.6  | n/a   | Pirf. Sild. | 137  | 2.37 | 63   | 2.24 | 76   | 94  | 8.5  | 33   | 99  | 8 |
| UIP/NSIP/PH | 57     | M  | 35 | 5.6 | 5.36 | Tada. | 90          | 2.98 | 70.5 | 2.59 | 78   | 87   | 4.1 | 13.4 | 93   | 3   |   |

**Appendix table S1:** Patients Characteristics. Abbreviations: iPAH: idiopathic pulmonary arterial hypertension; iPF: idiopathic pulmonary fibrosis; UIP: usual interstitial pneumonia; PH: pulmonary hypertension; CHP: chronic hypersensitivity pneumonitis; NSIP: nonspecific interstitial pneumonia. Trep. Treprostinil; Maci. Macitentan; Amb. Ambrisentan; Tada. Tadalafil; Epop. Epoprostenol; Sild. Sildenafil; Pirf. Pirfenidone; Vals. Valsartan; Losa. Losartan

**Appendix Table S2** Expression of Slug transcriptional target genes

| Entrez gene | Symbol   | Fold Change | Adjusted p-value |
|-------------|----------|-------------|------------------|
| 199920      | C1ORF168 | 1.71        | 1.6E-02          |
| 3866        | KRT15    | 1.69        | 4.4E-02          |
| 4585        | MUC4     | 1.67        | 4.2E-02          |
| 5304        | PIP      | 1.63        | 3.9E-02          |
| 72          | ACTG2    | 1.57        | 1.1E-02          |
| 158798      | AKAP14   | 1.57        | 1.7E-02          |
| 1999        | ELF3     | 1.53        | 4.9E-03          |
| 284434      | NWD1     | 1.49        | 2.6E-02          |
| 90827       | ZNF479   | 1.44        | 1.17E-08         |
| 338322      | NLRP10   | 1.43        | 5.85E-11         |
| 384         | ARG2     | 1.42        | 1.1E-03          |
| 2302        | FOXJ1    | 1.42        | 7.2E-03          |
| 9289        | ADGRG1   | 1.39        | 2.5E-03          |
| 51364       | ZMYND10  | 1.38        | 1.7E-02          |
| 3872        | KRT17    | 1.35        | 4.1E-02          |
| 2524        | FUT2     | 1.33        | 4.0E-02          |
| 388611      | CD164L2  | 1.32        | 1.65E-05         |
| 9013        | TAF1C    | 1.31        | 2E-10            |
| 5578        | PRKCA    | 1.29        | 8.13E-07         |
| 5498        | PPOX     | 1.29        | 3.7E-03          |
| 9536        | PTGES    | 1.28        | 3.E-047          |
| 60673       | ATG101   | 1.28        | 8.0E-04          |
| 414332      | LCN10    | 1.27        | 8.18E-06         |
| 91860       | CALML4   | 1.27        | 1.1E-03          |
| 375307      | CATIP    | 1.27        | 1.89E-05         |
| 254050      | LRRC43   | 1.27        | 3.8E-02          |
| 225689      | MAPK15   | 1.26        | 3.5E-03          |
| 4142        | MAS1     | 1.26        | 1.48E-05         |
| 3485        | IGFBP2   | 1.25        | 1.1E-02          |
| 122769      | LRR1     | 1.25        | 3.35E-05         |
| 9892        | SNAP91   | 1.25        | 1.87E-06         |

|        |          |      |          |
|--------|----------|------|----------|
| 1081   | CGA      | 1.24 | 1.28E-05 |
| 3782   | KCNN3    | 1.24 | 2.4E-03  |
| 1791   | DNTT     | 1.24 | 8.19E-06 |
| 3753   | KCNE1    | 1.24 | 1.3E-05  |
| 6625   | SNRNP70  | 1.23 | 3.89E-05 |
| 126328 | NDUFA11  | 1.23 | 5.66E-05 |
| 2571   | GAD1     | 1.23 | 5.56E-04 |
| 7712   | ZNF157   | 1.22 | 4.4E-04  |
| 55971  | BAIAP2L1 | 1.22 | 3.3E-02  |
| 10391  | CORO2B   | 1.21 | 4.9E-03  |
| 9369   | NRXN3    | 1.21 | 4.6E-02  |
| 9123   | SLC16A3  | 1.21 | 6.6E-03  |
| 8100   | IFT88    | 1.21 | 4.4E-02  |
| 51764  | GNG13    | 1.21 | 5.32E-06 |
| 80781  | COL18A1  | 1.21 | 2.17E-04 |
| 8938   | BAIAP3   | 1.21 | 2.2E-02  |
| 4588   | MUC6     | 1.21 | 5.4E-03  |
| 51265  | CDKL3    | 1.21 | 6.87E-05 |
| 7355   | SLC35A2  | 1.21 | 2.75E-05 |
| 283927 | NUDT7    | 1.21 | 2.4E-02  |
| 4357   | MPST     | 1.20 | 5.45E-05 |
| 221002 | RASGEF1A | 1.20 | 9.23E-08 |
| 2779   | GNAT1    | 1.20 | 8.37E-06 |
| 27324  | TOX3     | 1.20 | 4.0E-02  |
| 7441   | VPREB1   | 1.20 | 2.7E-04  |
| 81857  | MED25    | 1.20 | 6.87E-05 |
| 29948  | OSGIN1   | 1.20 | 9.33E-05 |

**Appendix Table S3** Slug transcriptional targets annotated for proliferation

| Entrez gene | Gene Symbol | Fold Change | Adjust p-value |
|-------------|-------------|-------------|----------------|
| 4585        | MUC4        | 1.66        | 4.2E-03        |
| 5304        | PIP         | 1.62        | 3.9E-02        |
| 3872        | KRT17       | 1.35        | 4.1E-02        |
| 5498        | PPOX        | 1.295       | 3.7E-03        |
| 4142        | MAS1        | 1.26        | 1.48E-05       |
| 3485        | IGFBP2      | 1.25        | 1.1E-02        |
| 2779        | GNAT1       | 1.20        | 8.37E-06       |
| 3868        | KRT16       | 1.18        | 5.8E-04        |
| 8425        | LTBP4       | 1.17        | 4.7E-02        |
| 8764        | TNFRSF14    | 1.16        | 1.0E-02        |
| 6725        | SRMS        | 1.13        | 4.5E-03        |
| 995         | CDC25C      | 1.12        | 4.1E-02        |
| 2068        | ERCC2       | 1.10        | 4.3E-02        |
| 5333        | PLCD1       | 1.10        | 1.6E-02        |
| 11334       | TUSC2       | 1.09        | 3.6E-02        |
| 283870      | BRICD5      | 1.09        | 4.6E-03        |

**Appendix Table S4** Slug transcriptional targets annotated for extracellular matrix

| Entrez gene | Gene Symbol | Fold Change | Adjusted p-value |
|-------------|-------------|-------------|------------------|
| 4585        | MUC4        | 1.66        | 4.2E-02          |
| 5304        | PIP         | 1.62        | 3.9E-02          |
| 72          | ACTG2       | 1.56        | 1.1E-02          |
| 5498        | PPOX        | 1.29        | 3.7E-03          |
| 414332      | LCN10       | 1.27        | 8.2E-06          |
| 225689      | MAPK15      | 1.26        | 3.5E-04          |
| 4142        | MAS1        | 1.26        | 1.5E-05          |
| 3485        | IGFBP2      | 1.25        | 1.1E-02          |
| 1081        | CGA         | 1.24        | 1.2E-05          |
| 80781       | COL18A1     | 1.21        | 2.1E-04          |
| 4588        | MUC6        | 1.21        | 5.4E-03          |
| 7441        | VPREB1      | 1.20        | 2.7E-04          |
| 79258       | MMEL1       | 1.17        | 2.4E-04          |
| 5020        | OXT         | 1.17        | 1.9E-03          |
| 1297        | COL9A1      | 1.17        | 2.6E-04          |
| 8425        | LTBP4       | 1.17        | 4.7E-02          |
| 144453      | BEST3       | 1.17        | 1.9E-11          |
| 5657        | PRTN3       | 1.15        | 2.6E-03          |
| 2316        | FLNA        | 1.14        | 1.8E-02          |
| 5364        | PLXNB1      | 1.14        | 3.6E-02          |
| 386653      | IL31        | 1.14        | 5.4E-03          |
| 79174       | CRELD2      | 1.14        | 1.6E-02          |
| 27098       | CLUL1       | 1.14        | 2.3E-03          |
| 1463        | NCAN        | 1.14        | 5.5E-03          |
| 4838        | NODAL       | 1.13        | 0.014            |
| 81          | ACTN4       | 1.12        | 0.006            |
| 64806       | IL25        | 1.12        | 0.005            |
| 653808      | ZG16        | 1.11        | 0.009            |
| 3562        | IL3         | 1.10        | 0.020            |
| 23436       | CELA3B      | 1.10        | 0.033            |
| 1775        | DNASE1L2    | 1.10        | 0.027            |
| 283870      | BRICD5      | 1.09        | 0.004            |

|        |          |      |       |
|--------|----------|------|-------|
| 3565   | IL4      | 1.08 | 0.040 |
| 2323   | FLT3LG   | 1.07 | 0.030 |
| 84639  | IL1F10   | 0.91 | 0.043 |
| 80740  | LY6G6C   | 0.89 | 0.018 |
| 124912 | SPACA3   | 0.87 | 0.007 |
| 89790  | SIGLEC10 | 0.81 | 0.001 |

**Appendix Table S5: Statistics**

| Figure  | Statistical Test            | Comparison                | p-value |
|---------|-----------------------------|---------------------------|---------|
| Fig. 1A | ANOVA (One-way)             | Ctrl vs. PF               | <0.0001 |
|         |                             | Ctrl vs. PAH              | >0.9999 |
|         |                             | Ctrl vs. PFPH             | <0.0001 |
|         |                             | PF vs. PAH                | <0.0001 |
|         |                             | PF vs. PFPH               | >0.9999 |
|         |                             | PAH vs. PFPH              | <0.0001 |
| Fig 1B  | T-test (Unpaired; two-tail) | PF vs. PFPH               | 0.842   |
| Fig 1C  | T-test (Unpaired; two-tail) | PF vs. PFPH               | 0.8251  |
| Fig 1D  | T-test (Unpaired; two-tail) | PF vs. PFPH               | 0.4316  |
| Fig 1E  | ANOVA (One-way)             | Ctrl vs. PF               | <0.0001 |
|         |                             | Ctrl vs. PAH              | <0.0001 |
|         |                             | Ctrl vs. PFPH             | <0.0001 |
|         |                             | PF vs. PAH                | 0.0001  |
|         |                             | PF vs. PFPH               | <0.0001 |
|         |                             | PAH vs. PFPH              | 0.889   |
| Fig 1F  | ANOVA (two-way)             | Non fibrosis              | 0.0006  |
|         |                             | Mild fibrosis             | 0.0003  |
|         |                             | Severe Fibrosis           | <0.0001 |
| Fig 1G  | ANOVA (One-way)             | PF vs PF-PH non fibrosis  | <0.0001 |
|         |                             | PF vs PF-PH fibrosis      | <0.0001 |
|         | ANOVA (two-way)             | PF fibro vs non-fibro     | 0.0028  |
|         |                             | PF-PH fibro vs. non-fibro | 0.0005  |
| Fig 2A  | T-test (Unpaired; two-tail) | PF vs. PFPH (EC)          | 0.0122  |
|         |                             | PF vs. PFPH (SMC)         | 0.0012  |
| Fig 2B  | T-test (Unpaired; two-tail) | PF vs. PFPH               | 0.0184  |
| Fig 2C  | T-test (Unpaired; two-tail) | PF vs. PFPH               | 0.0276  |



|        |                             |                             |         |
|--------|-----------------------------|-----------------------------|---------|
| Fig 2D | T-test (Unpaired; two-tail) | PF vs. PFPH (EpC)           | 0.4673  |
|        |                             | PF vs. PFPH (Fib)           | 0.9124  |
|        |                             | PF vs. PFPH (Macro $\Phi$ ) | 0.01    |
|        |                             | PF vs. PFPH (EC)            | 0.7689  |
|        |                             | PF vs. PFPH (SMC)           | #N/A    |
| Fig 2E | ANOVA (one-way)             | PF vs. PF-PH ( non fibro)   | 0.0225  |
|        |                             | PF vs. PF-PH (Fibro)        | 0.0287  |
|        | ANOVA (two-way)             | PF                          | 0.0363  |
|        |                             | PF-PH                       | 0.0019  |
| Fig 3D | T-test (Unpaired; two-tail) | PF vs. PFPH                 | 0.0035  |
| Fig 3E | T-test (Unpaired; two-tail) | PF vs. PFPH                 | 0.0125  |
| Fig 3F | T-test (Unpaired; two-tail) | PF vs. PFPH                 | 0.0104  |
| Fig 3G | ANOVA (one-way)             | Ctrl vs 12.5                | 0.689   |
|        |                             | Ctrl vs 25                  | 0.2456  |
| Fig 3H | ANOVA (one-way)             | Ctrl vs 12.5                | 0.05    |
|        |                             | Ctrl vs 25                  | 0.04    |
| Fig 3I | ANOVA (one-way)             | Ctrl vs 12.5                | 0.0214  |
|        |                             | Ctrl vs 25                  | 0.0027  |
| Fig 3J | ANOVA (one-way)             | Ctrl vs 12.5                | 0.0097  |
|        |                             | Ctrl vs 25                  | 0.0005  |
| Fig 4A | T-test (Unpaired; two-tail) | Ctrl vs. Bleo 2weeks        | <0.0001 |
| Fig 4B | T-test (Unpaired; two-tail) | Ctrl vs. Bleo 2weeks        | <0.0001 |
| Fig 4C | T-test (Unpaired; two-tail) | Ctrl vs. Bleo 2weeks        | <0.0001 |
| Fig 4D | T-test (Unpaired; two-tail) | Ctrl vs. Bleo 2weeks        | <0.0001 |
| Fig 4F | ANOVA (One-way)             | CTRL vs. Bleo               | 0.9715  |
|        |                             | CTRL vs. MCT                | 0.013   |
|        |                             | CTRL vs. Bleo-MCT           | <0.0001 |
|        |                             | Bleo vs. MCT                | 0.0267  |
|        |                             | Bleo vs. Bleo-MCT           | <0.0001 |
|        |                             | MCT vs. Bleo-MCT            | 0.0054  |
| Fig 4G | ANOVA (One-way)             | CTRL vs. Bleo               | 0.2128  |
|        |                             | CTRL vs. MCT                | 0.0097  |
|        |                             | CTRL vs. Bleo-MCT           | 0.0005  |
|        |                             | Bleo vs. MCT                | 0.4677  |
|        |                             | Bleo vs. Bleo-MCT           | 0.0457  |

|        |                 |                               |         |
|--------|-----------------|-------------------------------|---------|
|        |                 | MCT vs. Bleo-MCT              | 0.6417  |
| Fig 4H | ANOVA (One-way) | CTRL vs. Bleo                 | <0.0001 |
|        |                 | CTRL vs. MCT                  | 0.3889  |
|        |                 | CTRL vs. Bleo-MCT             | <0.0001 |
|        |                 | Bleo vs. MCT                  | <0.0001 |
|        |                 | Bleo vs. Bleo-MCT             | 0.8189  |
|        |                 | MCT vs. Bleo-MCT              | <0.0001 |
| Fig 4I | ANOVA (One-way) | CTRL vs. Bleo                 | 0.0025  |
|        |                 | CTRL vs. MCT                  | 0.0106  |
|        |                 | CTRL vs. Bleo-MCT             | 0.0219  |
|        |                 | Bleo vs. MCT                  | 0.933   |
|        |                 | Bleo vs. Bleo-MCT             | 0.801   |
|        |                 | MCT vs. Bleo-MCT              | 0.989   |
| Fig 4J | ANOVA (One-way) | CTRL vs. Bleo                 | 0.0066  |
|        |                 | CTRL vs. MCT                  | 0.8347  |
|        |                 | CTRL vs. Bleo-MCT             | 0.0011  |
|        |                 | Bleo vs. MCT                  | 0.0452  |
|        |                 | Bleo vs. Bleo-MCT             | 0.8903  |
|        |                 | MCT vs. Bleo-MCT              | 0.0089  |
| Fig 4K | ANOVA (One-way) | CTRL vs. Bleo                 | 0.0049  |
|        |                 | CTRL vs. MCT                  | 0.9976  |
|        |                 | CTRL vs. Bleo-MCT             | 0.0309  |
|        |                 | Bleo vs. MCT                  | 0.0078  |
|        |                 | Bleo vs. Bleo-MCT             | 0.8608  |
|        |                 | MCT vs. Bleo-MCT              | 0.0466  |
| Fig 4L | ANOVA (One-way) | CTRL vs. Bleo                 | 0.8909  |
|        |                 | CTRL vs. MCT                  | <0.0001 |
|        |                 | CTRL vs. Bleo-MCT             | <0.0001 |
|        |                 | Bleo vs. MCT                  | 0.0001  |
|        |                 | Bleo vs. Bleo-MCT             | <0.0001 |
|        |                 | MCT vs. Bleo-MCT              | 0.9892  |
| Fig 4M | ANOVA (One-way) | Bleo vs. Bleo-MCT (non fibro) | <0.0001 |
|        |                 | Bleo vs. Bleo-MCT (fibro)     | <0.0001 |
|        | ANOVA (two-way) | Bleo                          | 0.0464  |
|        |                 | Bleo-MCT                      | 0.2278  |

|        |                             |                                   |        |
|--------|-----------------------------|-----------------------------------|--------|
| Fig 5A | T-test (Unpaired; two-tail) | Bleo vs. Bleo-MCT (EC)            | 0.0707 |
|        |                             | Bleo vs. Bleo-MCT (SMC)           | 0.0081 |
| Fig 5B | ANOVA (One-way)             | CTRL vs. Bleo                     | 0.6646 |
|        |                             | CTRL vs. MCT                      | 0.6206 |
|        |                             | CTRL vs. Bleo-MCT                 | 0.2295 |
|        |                             | Bleo vs. MCT                      | 0.9998 |
|        |                             | Bleo vs. Bleo-MCT                 | 0.0176 |
|        |                             | MCT vs. Bleo-MCT                  | 0.0148 |
| Fig 5C | ANOVA (One-way)             | CTRL vs. Bleo                     | 0.9973 |
|        |                             | CTRL vs. MCT                      | 0.9999 |
|        |                             | CTRL vs. Bleo-MCT                 | 0.0095 |
|        |                             | Bleo vs. MCT                      | 0.9931 |
|        |                             | Bleo vs. Bleo-MCT                 | 0.006  |
|        |                             | MCT vs. Bleo-MCT                  | 0.0113 |
| Fig 5D | T-test (Unpaired; two-tail) | Bleo vs. Bleo-MCT (EpC)           | 0.7466 |
|        |                             | Bleo vs. Bleo-MCT (Fib)           | 0.8805 |
|        |                             | Bleo vs. Bleo-MCT (Macro $\Phi$ ) | 0.0266 |
|        |                             | Bleo vs. Bleo-MCT (EC)            | #N/A   |
|        |                             | Bleo vs. Bleo-MCT (SMC)           | #N/A   |
| Fig 5E | T-test (Unpaired; two-tail) | Bleo vs. Bleo-MCT                 | 0.6278 |
| Fig 5F | ANOVA (One-way)             | Bleo vs. Bleo-MCT (non fibro)     | 0.05   |
|        |                             | Bleo vs. Bleo-MCT (fibro)         | 0.0326 |
|        | ANOVA (two-way)             | Bleo                              | 0.0498 |
|        |                             | Bleo-MCT                          | 0.0375 |
| Fig 6A | T-test (Unpaired; two-tail) | Bleo vs. Bleo-MCT                 | 0.031  |
| Fig 6B | T-test (Unpaired; two-tail) | Bleo vs. Bleo-MCT                 | 0.0016 |
| Fig 6C | T-test (Unpaired; two-tail) | Bleo vs. Bleo-MCT                 | 0.0388 |
| Fig 7B | T-test (Unpaired; two-tail) | Si-Scrm vs Si-Slug                | 0.0007 |
| Fig 7C | T-test (Unpaired; two-tail) | Si-Scrm vs Si-Slug                | 0.0204 |
| Fig 7D | T-test (Unpaired; two-tail) | Si-Scrm vs Si-Slug                | 0.0024 |
| Fig 7E | T-test (Unpaired; two-tail) | Si-Scrm vs Si-Slug                | 0.0024 |
| Fig 7F | T-test (Unpaired; two-tail) | Si-Scrm vs Si-Slug                | 0.7385 |
| Fig 7G | T-test (Unpaired; two-tail) | Si-Scrm vs Si-Slug                | 0.4271 |
| Fig 7H | T-test (Unpaired; two-tail) | Si-Scrm vs Si-Slug                | 0.8538 |
| Fig 7I | T-test (Unpaired; two-tail) | Si-Scrm vs Si-Slug                | 0.1764 |

|        |                             |                                |         |
|--------|-----------------------------|--------------------------------|---------|
| Fig 7J | T-test (Unpaired; two-tail) | Si-Scrm vs Si-Slug             | 0.0041  |
| Fig 7K | ANOVA (One-way)             | Si-Scrm vs Si-Slug (non fibro) | 0.003   |
|        |                             | Si-Scrm vs Si-Slug (fibro)     | 0.0059  |
|        | ANOVA (two-way)             | Si-Scrm                        | 0.0318  |
|        |                             | Si-Slug                        | 0.0122  |
| Fig 7L | T-test (Unpaired; two-tail) | Si-Scrm vs Si-Slug (SMC)       | <0.0001 |
|        |                             | Si-Scrm vs Si-Slug (EC)        | 0.0009  |
| Fig 8A | T-test (Unpaired; two-tail) | Si-Scrm vs Si-Slug             | <0.0001 |
| Fig 8B | T-test (Unpaired; two-tail) | Si-Scrm vs Si-Slug             | 0.5324  |
| Fig 8C | ANOVA (One-way)             | Si-Scrm vs Si-Slug (non fibro) | 0.0035  |
|        |                             | Si-Scrm vs Si-Slug (fibro)     | 0.005   |
|        | ANOVA (two-way)             | Si-Scrm                        | 0.0162  |
|        |                             | Si-Slug                        | 0.026   |
| Fig 8D | T-test (Unpaired; two-tail) | Si-Scrm vs Si-Slug             | 0.0028  |
| Fig 8E | T-test (Unpaired; two-tail) | Si-Scrm vs Si-Slug             | 0.0003  |
| Fig 8F | T-test (Unpaired; two-tail) | Si-Scrm vs Si-Slug             | 0.0024  |
